# Supplementary material
Source: PubMed Central journal article supplement (PMC4162473)
Supplement: jn.114.196436_nutrition196436SupplementaryData1.pdf [file jn.114.196436_nutrition196436SupplementaryData1.pdf]

## Online Supporting Material

**SUPPLEMENTAL TABLE 1** Primers used for the quantification of microRNAs in human and murine plasma, mRNA abundance in human PBMC and murine livers, and creating the human COL1A1 reporter plasmid.

| Amplicon          | Forward Primer (5'-3')  | Reverse Primer (5'-3')  |
|-------------------|-------------------------|-------------------------|
| miSPIKE           | CTCAGGATGGCGGAGCGGTCT   |                         |
| U6                | CGCAAGGATGACACGCAAATT   |                         |
| miR-29b           | GTAGCACCATTTGAATCAGTGTT |                         |
| miR-200c          | TAATACTGCCGGGTAATGATGGA |                         |
| miR-1             | TGGAATGTAAAGAAGTATGTAT  |                         |
| miR-167a          | TGAAGCTGCCAGCATGATCTA   |                         |
| miR-824           | TAGACCATTTGTGAGAAGGGA   |                         |
| GAPDH             | TCCACTGGCGTCTTCACC      | GGCAGAGATGATGACCCTTT    |
| ZEB1 <sup>1</sup> | TTCAAACCCATAGTGGTTGCT   | TGGGAGATACCAAACCAACTG   |
| RUNX2             | CGCCCCTCCCTGAACTCT      | TGCCTGCCTGGGATCTGTA     |
| KLF8 (ZNF74)      | CAAGCCATTATGGTGCCTAC    | ATAGAGCCCGGAGTGAGAAC    |
| COL1A1 3'-UTR     | CGTGCGCATTCCGGAGGAGATC  | CGAAGCTTGAGGCCTGAGAAGCC |

<sup>1</sup>Abbreviations used: *KLF8*, Kruppel-like factor 8; *RUNX2*, runt-related transcription factor 2; *ZEB1*, zinc finger E-box binding homeobox 1.

## Online Supporting Material

**SUPPLEMENTAL FIGURE 1** Schematic of microRNA reporter plasmids and the  $\beta$ -galactosidase control plasmid. Numerals denote the position of nucleotides in the 3'-UTR in *COL1A1* (GenBank NM\_000088) and *ZEB1* (GenBank NM\_001128128).

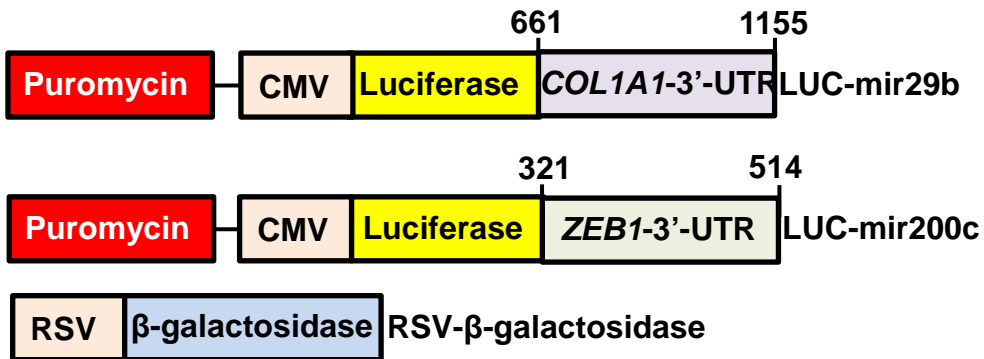

Online Supporting Material

SUPPLEMENTAL FIGURE 2 Time courses of *RUNX2* and *ZEB1* mRNA in PBMC from an adult male.

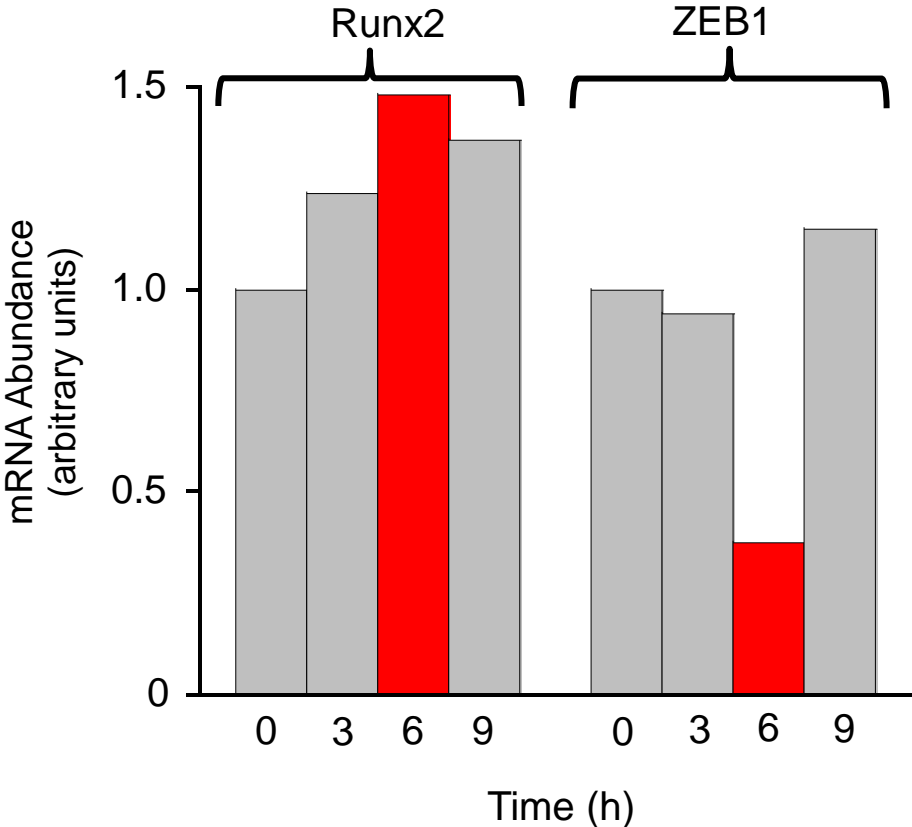

## Online Supporting Material

**SUPPLEMENTAL TABLE 2** Composition of microRNA-depleted (ExoMinus) and microRNA-sufficient (ExoPlus) diets.

| ExoMinus                                                          | ExoPlus                                                        | g/kg  |
|-------------------------------------------------------------------|----------------------------------------------------------------|-------|
| Cornstarch                                                        | Cornstarch                                                     | 330   |
| Soy Protein                                                       | Soy Protein                                                    | 163   |
| Dextrinized cornstarch                                            | Dextrinized cornstarch                                         | 132   |
| Milk Powder ( <b>without exosomes</b> )<br>containing ~5% lactose | Milk Powder ( <b>with exosomes</b> )<br>containing ~5% lactose | 105   |
| Sucrose                                                           | Sucrose                                                        | 100   |
| Soybean oil (no additives)                                        | Soybean oil (no additives)                                     | 70    |
| Fiber                                                             | Fiber                                                          | 50    |
| Mineral mix (AIN-93G-MX)                                          | Mineral mix (AIN-93G-MX)                                       | 35    |
| Vitamin mix (AIN-93-VX)                                           | Vitamin mix (AIN-93-VX)                                        | 10    |
| L-Cystine                                                         | L-Cystine                                                      | 3     |
| Choline bitartrate (41.1% choline)                                | Choline bitartrate (41.1% choline)                             | 2.5   |
| Tert-butylhydroquinone                                            | Tert-butylhydroquinone                                         | 0.014 |

<sup>1</sup>Abbreviation used: AIN-93G, American Institute of Nutrition growth diet; MX, mineral mixture; VX, vitamin mixture.
